# Supplementary material for: Contemporary biodiversity pattern is affected by climate change at multiple temporal scales in steppes on the Mongolian Plateau
Source: Copernicus journal article supplement (doi:10.5194/bg-20-2869-2023), 2023-07-19
Supplement: Supplementary file 1 [file bg-20-2869-2023-supplement.zip]

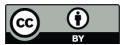

*Supplement of*

**Contemporary biodiversity pattern is affected by climate change at multiple temporal scales in steppes on the Mongolian Plateau**

**Zijing Li et al.**

*Correspondence to:* Zhiyong Li (zylee007@imu.edu.cn)

- bg-20-2869-2023-supplement-title-page.pdf
- Supporting Information
  - Supporting Information\_Supplementary Figures.pdf
  - Supporting Information\_Supplementary Tables.pdf

The copyright of individual parts of the supplement might differ from the article licence.
