# Supplementary material for: Contemporary biodiversity pattern is affected by climate change at multiple temporal scales in steppes on the Mongolian Plateau
Source: Copernicus journal article supplement (doi:10.5194/bg-20-2869-2023), 2023-07-19
Supplement: Supplementary file 3 [file bg-20-2869-2023-supplement.zip]

**Table S1** The summary of plant functional trait type and their data type

| Functional trait type          | Date type | Functional trait                                                                                                                                                                       |
|--------------------------------|-----------|----------------------------------------------------------------------------------------------------------------------------------------------------------------------------------------|
| Flowering period               | Numerical | The month begins to blossom                                                                                                                                                            |
| Fruit ripening period          | Numerical | The month of ripening fruit                                                                                                                                                            |
| Fruit type                     | Name      | 1: Caryopsis; 2: Capsule; 3: Achene; 4: Silicle; 5: Nut; 6: Utricle; 7: Berry; 8: Legume; 9: Cremocarp; 10: Follicle; 11: Silique; 12: Cone                                            |
| Growth form                    | Name      | 1: Shrub (SH); 2: Sub-shrub (SS); 3: Perennial bunchgrass (PB); 4: Perennial rhizome grass (PR); 5: Perennial Sedges (PS); 6: Perennial forbs (PF); 7: Annual and biennials herbs (AB) |
| Inflorescence                  | Name      | 1: Capitulum; 2: Spike; 3: Single; 4: Panicle; 5: Monochasium; 6: Raceme; 7: Dichasium; 8: Whorled Umbel; 9: Umbel; 10: Compound Umbel; 11: Compound Capitulum; 12: Corymb             |
| Length of the flowering period | Numerical | Number of months of flowering                                                                                                                                                          |
| Life form                      | Name      | 1: Phanerophytes (P); 2: Chamaephytes (C); 3: Hemicryptophytes (H); 4: Cryptophytes (Cr); 5: Therophytes (T)                                                                           |

---

|                            |             |                                                                                                                  |
|----------------------------|-------------|------------------------------------------------------------------------------------------------------------------|
| Petiole                    | Binary data | 0: No; 1: Yes                                                                                                    |
| Phyllotaxy                 | Name        | 1: Alternate; 2: Base; 3: Opposite; 4: Fascicled; 5:<br>Scattered; 6: Whorled                                    |
| Single or<br>Compound leaf | Name        | 1: Single; 2: Compound leaf                                                                                      |
| Water ecotypes             | Name        | 1: Superxerophyte (SX); 2: Xerophyte (X); 3:<br>Xero-mesophyte (XM); 4: Meso-xerophyte (MX); 5:<br>Mesophyte (X) |
| leaf length                | Numerical   |                                                                                                                  |
| leaf width                 | Numerical   |                                                                                                                  |
| plant height               | Numerical   |                                                                                                                  |

---

**Table S2** Principal component analysis (PCA) results of paleoclimate climate change  
and current climate variables

| Variables           |                     | Component 1 |
|---------------------|---------------------|-------------|
| Present climate     | AI                  | 0.71        |
|                     | MAT                 | -0.71       |
|                     | Cumulative (%)      | 70.30       |
| Paleoclimate change | AMAT <sub>mid</sub> | 0.62        |
|                     | AMAT <sub>lgm</sub> | 0.62        |
|                     | AMAP <sub>lgm</sub> | -0.48       |
|                     | Cumulative (%)      | 64.67       |
